# Supplementary material
Source: Springer Nature journal article supplement (https://www.springermedizin.de/resource/supplementary/12879_2014_3164_MOESM3_ESM.pdf/9446124)
Supplement: MOESM3 [file 9446124]

Patients with  
suspected PJI  
(n=332)

Application of study definition of "gold standard infection" ---> Excluded (n=10)

Gold standard  
positive  
(n=79, 24.5%)

Gold standard  
negative  
(n=243, 75.5%)

Culture  
positive  
(n=66,  
83.5%)

Culture  
negative  
(n=13,  
16.5%)

Culture  
positive  
(n=7,  
2.9%)

Culture  
negative  
(n=236,  
97.1%)
